# Supplementary material for: Diffuse idiopathic skeletal hyperostosis was the specific risk factors of methicillin-susceptible Staphylococcus aureus spine infection: a retrospective study in a single center
Source: PeerJ. 2024 Nov 26;12:e18432. doi: 10.7717/peerj.18432 (PMC11606330; doi:10.7717/peerj.18432)
Supplement: Supplemental Information 1 — Abbreviations: M: Male, F: Female, AP: Angina pectoris, BA: Bronchial asthma, BPH: Benign prostatic hyperplasia, CHF: Choronic heart failure, CKD: Choronic kidney failure, CVC: Central venus catheter, DISH: Diffuse idiopathic skeletal hyperostosis, DM: Diabetes, HL: Hyper lipidemia, HOA: Hip osteoarthritis, HT: Hyper tension, IE: Infectious endocarditis, IP: Interstitial pneumonia, KOA: Knee osteoarthritis, LCS: Lumber spinal canal stenosis, AMI: Myocardial infarction, PM: Pacemaker, PVH: Peripheral vein catheter. [file peerj-12-18432-s001.xlsx]

## Sheet: Patient data
Age	Gender	Diagnosis	DM	Steroid use	CRP day1	WBC day1	CRP day3	WBC day3	CRP3/1	WBC3/1	Outcome	Level	Past history	Group	DISH	OA/In	bridging	Scoliosis
70	M	Facet infection	-	-	20.66	14400	16.76	9500	81.1229	65.9722	E	L4/5 Left facet	HT, HL, DISH (T-spine)	A	+	+	+	-
18	M	Facet infection	-	-	8.27	13300	5.77	8100	69.7703	60.9023	E	L2/3 Left facet	-	A	-	+	-	+
50	M	Facet infection	-	-	27.11	11500	23.4	10300	86.315	89.5652	D3	L4/5 Right facet	Atopic dermatitis	A	-	+	-	+
79	F	Discitis	-	-	30.74	26000	32.09	15900	104.392	61.1538	Death	T9	RA, HT, DISH (T-spine)	A	+	+	+	-
66	M	Facet infection	-	+	22.67	3200	11.28	3300	49.7574	103.125	E	L5/S1 Right facet	Nephrotic syndrome, Stroke	A	-	+	-	+
89	F	Discitis	-	-	11	10400	8	8100	72.7273	77.8846	A	L3/4	Urinary tract cancer	A	-	+	+	+
83	F	Discitis	-	-	22.97	19500	17.26	15800	75.1415	81.0256	B	T12/L1, L4/5	AR, MR	A	-	+	+	+
89	M	Discitis	-	-	26.25	41200	23.61	37400	89.9429	90.7767	Death	L3/4	AP, HT, CKD, Stroke, LCS, KOA, DISH (T-spine)	A	+	+	+	+
57	M	Discitis	-	-	7.41	17400	26.81	11400	361.808	65.5172	E	L2/3	CKD, DISH (T-spine)	A	+	+	+	-
70	M	Discitis	-	-	9.02	15400	20.3	7500	225.055	48.7013	E	L4/5/S1	T12,L1 burst fracture, DISH (T-spine)	A	+	+	+	+
88	M	Discitis	-	-	25.06	24300	18.77	26900	74.9002	110.7	Death	T9/10	-	A	-	+	+	+
58	F	Discitis	+	-	7.04	19300	6.63	13000	94.1761	67.3575	E	L5/S1	HHS	A	-	+	+	+
75	M	Facet infection	-	-	27.38	10800	16.22	7900	59.2403	73.1481	D3	L3/4/5/S1 Right facet	Coronic cancer, Prostate cancer, Stroke, Af	A	-	+	+	+
79	M	Discitis	-	-	7.54	15400	14.92	6700	197.878	43.5065	B	T12/L1/2	T12 burst fracture, DISH (T-spine)	A	+	+	+	-
84	F	Bacteremia	-	-	3.65	8000	1.17	2600	32.0548	32.5			Dialysis, Encephalorrhagy, Gallstone	B	-		-	+
53	M	Bacteremia	-	-	11	21000	21.78	15900	198	75.7143			HT, HOA	B	-		+	-
75	F	aortitis	+	+	14.86	26400	11.09	23100	74.6299	87.5	Death		Athma, Coronic cancer, Thyroid cancer, Hysteromyoma, HT, BA, DM	B	-		-	-
76	M	Pneumoniae	+	+	3.41	4500	7.68	7200	225.22	160			DM, BPH, Dialysis, CHF	B	-		-	-
66	M	cellulitis	-	-	23.65	9000	16.47	15600	69.6406	173.333			Colonic cancer, HT	B	-		+	+
31	M	Bacteremia	-	-	13.58	16300	4.34	5200	31.9588	31.9018				B	-		-	+
88	F	Bacteremia	-	+	8.8	11500	6.02	9000	68.4091	78.2609			BPH, Esophageal cancer	B	-		+	-
91	F	Abcess	-	-	14.05	7500	36.68	6200	261.068	82.6667	Death	Knee	Stroke,Diverticula, Parkinson's desease	B	-		+	+
62	M	cellulitis	-	-	19.06	8700	11.65	9000	61.1228	103.448		Foot	SSS(PM), HT, Parkinson's desease, Depression	B	-		+	-
94	F	Bacteremia	-		26.19	16600	26.04	14400	99.4273	86.747	Death		OMI, BA, Left pneumonectomy (TB)	B	-		+	-
75	M	Bacteremia	-	+	2.37	8100	1.73	8800	72.9958	108.642			HT, Encephalorrhagy	B	-		-	-
76	M	Abcess	＋	-	38.02	27000	29.45	25400	77.4592	94.0741		Perianal abcess	DM	B	-		+	+
95	F	Bacteremia	+	-	16.96	19600	12.46	10300	73.467	52.551	Death		CHF(CABG), BPH, Ureterolithiasis, DM	B	-		+	+
88	F	cellulitis	-	+	14.34	14000	19.3	15000	134.589	107.143	Death	Foot	Colonic cancer, IP	B	-		+	+
90	F	IE	-	-	14.25	11100	16.41	16000	115.158	144.144			Stomac cancer	B	-		+	+
42	M	Bacteremia	+	-	39.46	22500	11.94	21400	30.2585	95.1111			DM, Alchoholic	B	-		-	-
85	F	Bacteremia	+	-	8.28	23300	6.57	22800	79.3478	97.8541			Dimentia, Schizophrenia, DM, Parkinson desease	B	-		+	+
72	M	Abcess	-	-	13.47	5600	8.92	17300	66.2212	308.929	Death	Head	Af, DM, Dimentia, HT	B	-		-	-
70	M	ileus	+	-	28.31	10400	37.22	17800	131.473	171.154			Stroke, Dialysis, DISH (Whole spine)	B	+		+	+
65	M	Abcess	+	-	30.46	10200	36.9	11200	121.142	109.804		Right forefinger	Stroke, CHF(CABG)	B	-		+	-
84	M	IE	-	-	11.25	16900	8.6	2800	76.4444	16.568			Stroke, AP, MR, CHF, COPD	B	-		+	+
33	F	IE	-	-	10.26	20900	19.85	20400	193.47	97.6077			-	B	-		-	+
79	M	Pneumoniae	+	-	4.98	9800	7.7	7200	154.618	73.4694			SAH, DM, HT, HL, AP, Dialysis, PM	B	-		+	-
89	M	Bacteremia	+	-	10.33	14500	10.21	16700	98.8383	115.172			ASO, CHF, Pacemaker, BPH, DISH (T-spine)	B	+		+	-
87	M	CVC infection	-	+	3.62	11200	1.73	11100	47.7901	99.1071	Death		Stroke, HT, Stomach cancer, DISH (T-spine)	C	+		+	+
89	F	CVC infection	-	-	0.31	2900	0.29	2800	93.5484	96.5517			Dialysis, Htpertension	C	-		-	+
93	M	CVC infection	-	-	21.08	6000	14.94	8400	70.8729	140			Stomach cancer, HT, DISH (T,L-spine)	C	+		+	+
72	F	CVC infection	-	-	18.54	8480	12.04	8200	64.9407	96.6981	Death		Drug rush	C	-		-	+
92	M	Port infection	-	-	8.8	11500	6.02	9000	68.4091	78.2609			BPH, Esophageal cancer	C	-		+	+
79	M	CVC infection	＋	-	3.78	13100	11.07	12800	292.857	97.7099			DM, Stroke,Prostate cancer, anorexia	C	-		+	+
20	M	Port infection	+	-	2.47	10700	4.96	6700	200.81	62.6168			Alcoholism	C	-		-	-
83	F	CVC infection	+	-	14.38	13400	22.17	14200	154.172	105.97	Death		HT, DM, ,HL, pneumoniae	C	-		+	-
85	M	CVC infection	-	-	16.71	26900	21.21	21200	126.93	78.8104				C	-		+	+
82	F	Port infection	+	-	4.56	18200	19.12	8700	419.298	47.8022			MI	C	-		-	-
75	M	PVC infection	-	-	22.8	15000	22.65	14500	99.3421	96.6667	Death		-	C	-		+	+
90	M	PM infection	+	-	16.96	19600	12.46	10300	73.467	52.551	Death		Dialysis, AP, BPH, Stroke, cholecystitis	C	-		+	-
81	M	CVC infection	-	-	5.4	7200	4.82	7500	89.2593	104.167			HL	C	-		+	+
89	F	CVC infection	-	-	12.79	7200	15.99	6400	125.02	88.8889	Death		UTI, Pneumoniae	C	-		-	+
92	F	CVC infection	-	-	4.62	17700	7.31	7000	158.225	39.548			Pacemaker, HT, Hashimoto’s disease	C	-		+	+
75	M	PVC infection	+	-	10.45	11100	11.8	12400	112.919	111.712			Stroke, Cholecystitis	C	-		+	+
62	M	CVC infection	-	-	12.67	9400	20.36	11500	160.695	122.34				C	-		+	-
78	F	PVC infection	-	+	4.61	16400	14.16	5600	307.158	34.1463			Clone desease, Hemophagocytic lymphohistiocytosis	C	-		+	+
87	F	CVC infection	+	-	12.27	15600	7.85	8500	63.9772	54.4872			DM, AP	C	-		+	+
49	M	CVC infection	+	-	3.33	12900	4.03	8500	121.021	65.8915			Type1 DM	C	-		+	+
87	F	CVC infection	+	-	9.92	12800	12.12	11400	122.177	89.0625				C	-		+	+

## Sheet: Statictis data
	A (Spine infection)	B (Other infection)	C (Implant infection)	All	p-value
Patient number	14	24	21	59	-
Age	69.4±19.3	73.5±18.2	78.4±17.1	74.3±18.1	0.317
Male (%)	71.4	58.3	57.1	61	0.648
Diabetes patient rate (%)	7.1*	41.7	42.9	30.5	0.029
Use rate of steroid (%)	7.1	21.7	9.5	13.6	0.36
WBC at day1 (×100/µl)	172.9±90.2	143.1±66.4	127.3±53.5	144.5±7.0	0.16
CRP at day1 (mg/dl)	18.1±9.1*	15.9±10.3	10.0±6.6	14.3±9.3	0.014
WBC at day3/day1 (%)	74.2±19.4	104.3±59.2	84.0±28.0	89.9±43.6	0.057
CRP at day3/day1 (%)	117.3±86.5	106.1±61.6	141.6±93.9	121.4±80.4	0.323
Scoliosis rate (%)	71.4	50	76.2	64.4	0.154
Bridging rate (%)	78.6	66.7	76.2	72.9	0.667
DISH rate (%)	42.9*	8.3	9.5	16.9	0.022
Mortality rate (%)	21.4	25	28.6	25.4	0.89
The data showed average ± standard deviation.
* statistical significant (p<0.05)

## Sheet: Abbreviation
Abbreviation
AP	Angina pectoris
BA	Bronchial asthma
BPH	Benign prostatic hyperplasia
CHF	Choronic heart failure
CKD	Choronic kidney failure
CVC	Central venus catheter
DISH	Diffuse idiopathic skeletal hyperostosis
DM	Diabetes
HL	Hyper lipidemia
HOA	Hip osteoarthritis
HT	Hyper tension
IE	Infectious endocarditis
IP	Interstitial pneumonia
KOA	Knee osteoarthritis
LCS	Lumber spinal canal stenosis
MI	Myocardial infarction
PM	Pacemaker
PVC	Peripheral vein catheter
